# Supplementary material for: Fast hydrolysis for chemical recycling of polyethylene terephthalate (PET)
Source: Royal Society of Chemistry journal article supplement (doi:10.1039/d4su00034j), 2024-01-01
Supplement: d4su00034j1.pdf [file d4su00034j1.pdf]

## SUPPORTING INFORMATION

### Fast Hydrolysis for Chemical Recycling of Polyethylene Terephthalate (PET)

Patrícia Pereira <sup>a</sup>, Willem Slear <sup>a</sup>, Angelo Testa <sup>a</sup>, Kevin Reasons <sup>a</sup>, Peter Guirguis <sup>a</sup>, Phillip E. Savage <sup>a</sup>, Christian W. Pester <sup>a,b</sup>

<sup>a</sup> *Department of Chemical Engineering, The Pennsylvania State University, University Park, PA 16802, United States.*

<sup>b</sup> *Department of Chemistry and Department of Materials Science and Engineering, The Pennsylvania State University, University Park, Pennsylvania 16802, United States.*

Table S1. Experimental reactor loadings.

| $T_{SP}$ (°C) | *Water loading (mL) | PET loading (g) |
|---------------|---------------------|-----------------|
| 300           | 3.00                | 0.300           |
| 350           | 2.58                | 0.258           |
| 400           | 1.43                | 0.143           |
| 450           | 0.59                | 0.059           |
| 480           | 0.50                | 0.050           |
|               |                     | 0.063           |
| 500           | 0.46                | 0.046           |
|               |                     | 0.058           |
| 510           | 0.44                | 0.044           |
|               |                     | 0.055           |
|               |                     | 0.073           |
|               |                     | 0.110           |
|               |                     | 0.220           |
| 540           | 0.40                | 0.040           |
|               |                     | 0.050           |
| 550           | 0.39                | 0.039           |
|               |                     | 0.049           |
| 570           | 0.37                | 0.037           |

\* water loading is such that reactor pressure would be 30 MPa at the set point temperature.

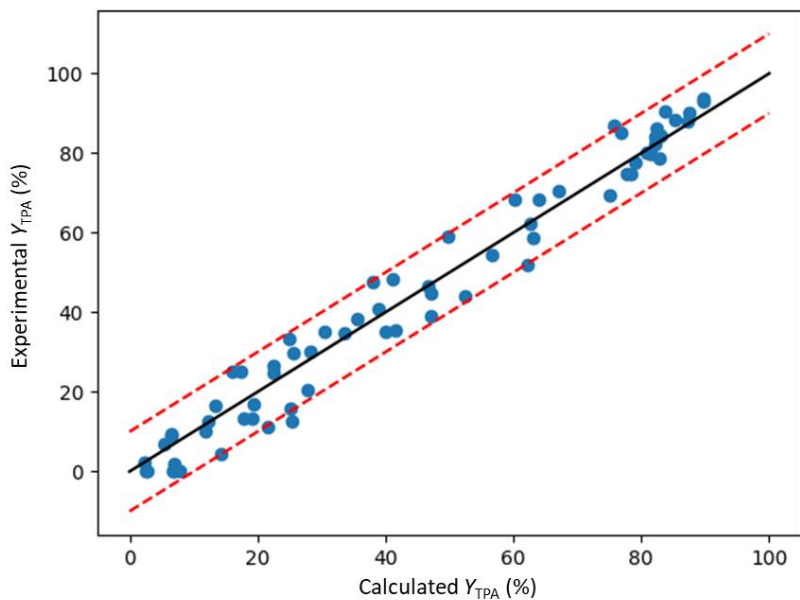

Figure S1. Comparison of experimental TPA yield with calculations made by Random Forest Regression, based on the dataset utilized for model training.

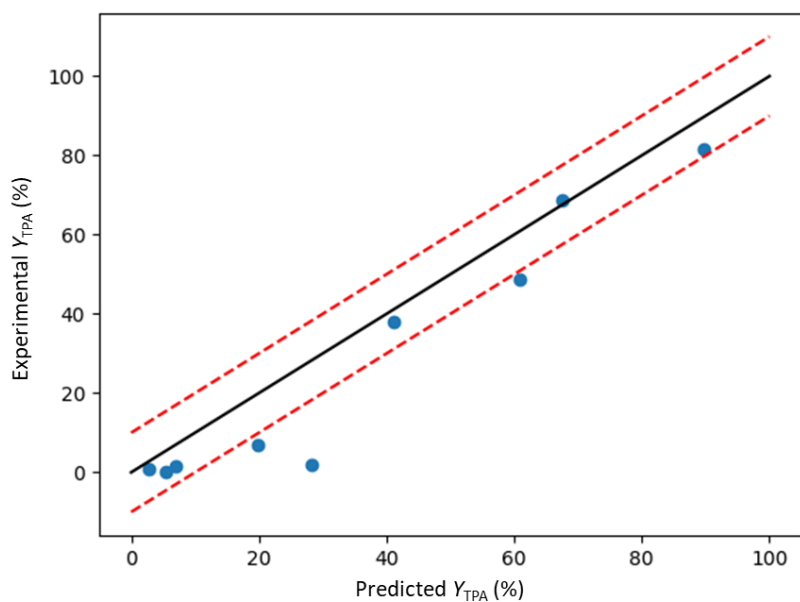

Figure S2. Comparison of experimental TPA yield with predictions made by Random Forest Regression, based on the dataset utilized for model predictions.

Table S2. Conditions and results for fast hydrolysis experiments. Uncertainties are measured standard deviations.  $T_{\text{final}}$  is the temperature calculated from equation 1 and N is the number of independent runs.

| $T_{\text{SP}}$<br>(°C) | $t$<br>(sec) | $m_{\text{PET}}/$<br>$m_w$ | $T_{\text{final}}$<br>(°C) | log<br>$SI$ | $Y_{\text{TPA}}$ (%) | $Y_{\text{US}}$ (%) | $Y_{\text{isophthalic}}$<br>acid (%) | $Y_{\text{phthalic}}$<br>acid (%) | $Y_{\text{BHET}}$<br>(%) | $Y_{\text{Benzoic}}$<br>Acid (%) | Ring Bal<br>(%)               | $\xi$ (°C·min)                | N |
|-------------------------|--------------|----------------------------|----------------------------|-------------|----------------------|---------------------|--------------------------------------|-----------------------------------|--------------------------|----------------------------------|-------------------------------|-------------------------------|---|
| 300                     | 15           | 1/10                       | 105                        | -1.7        | 0 ± 0                | 100 ± 0             | 0 ± 0                                | 0 ± 0                             | 0 ± 0                    | 0 ± 0                            | 100 ± 0                       | inf                           | 3 |
| 300                     | 60           |                            | 241                        | 9.6         | 0 ± 0                | 98 ± 0              | 0 ± 0                                | 0 ± 0                             | 0 ± 0                    | 0 ± 0                            | 95 ± 3                        | inf                           | 3 |
| 300                     | 85           |                            | 272                        | 11.8        | 0 ± 0                | 96 ± 0              | 0 ± 0                                | 0 ± 0                             | 0 ± 0                    | 0 ± 0                            | 97 ± 3                        | inf                           | 3 |
| 300                     | 115          |                            | 289                        | 13.2        | 0 ± 0                | 97 ± 3              | 0 ± 0                                | 0 ± 0                             | 0 ± 0                    | 0 ± 0                            | 98 ± 3                        | inf                           | 3 |
| 300                     | 175          |                            | 298                        | 14.5        | 2 ± 1                | 79 ± 7              | 5 ± 0                                | 0 ± 0                             | 8 ± 0                    | 0 ± 0                            | 94 ± 9                        | (6.8 ± 6.0) × 10 <sup>6</sup> | 4 |
| 350                     | 55           |                            | 270                        | 10.9        | 0 ± 0                | 93 ± 0              | 0 ± 0                                | 0 ± 0                             | 0 ± 0                    | 0 ± 0                            | 91 ± 2                        | Inf                           | 4 |
| 350                     | 60           |                            | 281                        | 11.5        | 0 ± 0                | 92 ± 0              | 0 ± 0                                | 0 ± 0                             | 0 ± 0                    | 0 ± 0                            | 92 ± 0                        | Inf                           | 4 |
| 350                     | 65           |                            | 290                        | 12.1        | 0 ± 0                | 87 ± 0              | 0 ± 0                                | 0 ± 0                             | 0 ± 0                    | 0 ± 0                            | 89 ± 5                        | Inf                           | 4 |
| 350                     | 75           |                            | 306                        | 13.1        | 0 ± 0                | 90 ± 3              | 1 ± 0                                | 0 ± 0                             | 1 ± 0                    | 0 ± 0                            | *92 ± 2                       | (1.2 ± 1.4) × 10 <sup>9</sup> | 3 |
| 350                     | 115          |                            | 337                        | 15.2        | 11 ± 10              | 80 ± 12             | 3 ± 4                                | 1 ± 0                             | 4 ± 3                    | 0 ± 0                            | 99 ± 12                       | (2.5 ± 4.4) × 10 <sup>7</sup> | 5 |
| 350                     | 175          |                            | 348                        | 16.5        | 35 ± 13              | 61 ± 5              | 7 ± 4                                | 0 ± 0                             | 7 ± 4                    | 1 ± 0                            | 111 ± 15                      | (9.7 ± 4.8) × 10 <sup>3</sup> | 6 |
| 400                     | 45           |                            | 277                        | 10.9        | 1 ± 1                | 87 ± 9              | 4 ± 3                                | 0 ± 0                             | 5 ± 4                    | 0 ± 0                            | 96 ± 11                       | (1.6 ± 2.8) × 10 <sup>6</sup> | 6 |
| 400                     | 55           |                            | 308                        | 12.6        | 2 ± 1                | 88 ± 7              | 2 ± 0                                | 0 ± 0                             | 1 ± 0                    | 0 ± 0                            | 93 ± 7                        | (7.8 ± 5.0) × 10 <sup>5</sup> | 3 |
| 400                     | 60           |                            | 320                        | 13.2        | 1 ± 0                | 79 ± 3              | 5 ± 1                                | 0 ± 0                             | 4 ± 2                    | 0 ± 0                            | 89 ± 5                        | (1.4 ± 0.8) × 10 <sup>7</sup> | 3 |
| 400                     | 65           |                            | 331                        | 13.8        | 10 ± 1               | 74 ± 12             | 3 ± 3                                | 0 ± 0                             | 0 ± 1                    | 0 ± 0                            | 87 ± 13                       | (2.4 ± 0.4) × 10 <sup>6</sup> | 5 |
| 400                     | 75           |                            | 349                        | 14.8        | 13 ± 3               | 76 ± 14             | 18 ± 7                               | 0 ± 0                             | 1 ± 0                    | 1 ± 1                            | 110 ± 6                       | (2.0 ± 0.8) × 10 <sup>4</sup> | 3 |
| 400                     | 85           |                            | 362                        | 15.5        | 12 ± 2               | 70 ± 12             | 10 ± 6                               | 0 ± 0                             | 4 ± 2                    | 2 ± 1                            | 99 ± 9                        | (2.0 ± 0.1) × 10 <sup>4</sup> | 3 |
| 400                     | 95           |                            | 372                        | 16.1        | 35 ± 12              | 59 ± 7              | 14 ± 8                               | 0 ± 0                             | 1 ± 0                    | 0 ± 0                            | 109 ± 5                       | (4.7 ± 2.7) × 10 <sup>3</sup> | 3 |
| 400                     | 115          |                            | 385                        | 16.9        | 68 ± 5               | 28 ± 6              | 13 ± 7                               | 0 ± 0                             | 2 ± 1                    | 0 ± 0                            | *112 ± 4                      | (1.3 ± 0.2) × 10 <sup>3</sup> | 3 |
| 400                     | 175          |                            | 398                        | 18.2        | 87 ± 9               | 2 ± 1               | 12 ± 8                               | 1 ± 0                             | 3 ± 2                    | 2 ± 1                            | 106 ± 5                       | (1.4 ± 0.3) × 10 <sup>3</sup> | 6 |
| 450                     | 45           |                            | 311                        | 12.4        | 7 ± 5                | 78 ± 8              | 3 ± 1                                | 0 ± 0                             | 6 ± 1                    | 1 ± 1                            | 95 ± 15                       | (2.0 ± 1.9) × 10 <sup>5</sup> | 4 |
| 450                     | 55           |                            | 345                        | 14.1        | 1 ± 0                | 73 ± 10             | 3 ± 1                                | 0 ± 0                             | 9 ± 4                    | 10 ± 4                           | 96 ± 1                        | (2.3 ± 0.3) × 10 <sup>6</sup> | 4 |
| 450                     | 60           |                            | 359                        | 14.7        | 30 ± 29              | 45 ± 33             | 10 ± 6                               | 0 ± 0                             | 6 ± 5                    | 0 ± 0                            | 90 ± 28                       | (1.0 ± 1.5) × 10 <sup>5</sup> | 7 |
| 450                     | 65           |                            | 372                        | 15.3        | 41 ± 9               | 48 ± 2              | 10 ± 1                               | 0 ± 0                             | 2 ± 2                    | 1 ± 1                            | 103 ± 9                       | (1.9 ± 0.9) × 10 <sup>3</sup> | 3 |
| 450                     | 75           |                            | 392                        | 16.3        | 49 ± 5               | 48 ± 1              | 12 ± 1                               | 0 ± 0                             | 4 ± 2                    | 0 ± 0                            | 113 ± 5                       | (1.5 ± 0.3) × 10 <sup>3</sup> | 4 |
| 450                     | 85           |                            | 407                        | 17.0        | 40 ± 17              | 18 ± 7              | 14 ± 4                               | 1 ± 0                             | 8 ± 3                    | 2 ± 1                            | *83 ± 13                      | (3.5 ± 1.8) × 10 <sup>3</sup> | 3 |
| 450                     | 105          | 427                        | 18.0                       | 84 ± 8      | 6 ± 1                | 11 ± 2              | 0 ± 0                                | 2 ± 2                             | 0 ± 0                    | 103 ± 5                          | (8.3 ± 1.3) × 10 <sup>2</sup> | 5                             |   |
| 450                     | 135          | 441                        | 19.0                       | 77 ± 14     | 3 ± 2                | 13 ± 2              | 2 ± 1                                | 1 ± 1                             | 1 ± 0                    | 97 ± 13                          | (1.5 ± 0.6) × 10 <sup>3</sup> | 5                             |   |

Table S2. Continued.

| $T_{SP}$<br>(°C) | $t$ (sec) | $m_{PET}/$<br>$m_w$ | $T_{final}$<br>(°C) | $\log SI$ | $Y_{TPA}$ (%) | $Y_{US}$ (%) | $Y_{isophthalic}$<br>acid (%) | $Y_{phthalic}$<br>acid (%) | $Y_{BHET}$<br>(%) | $Y_{Benzoic}$<br>Acid (%) | Ring Bal<br>(%) | $\xi$ (°C·min)                | N |
|------------------|-----------|---------------------|---------------------|-----------|---------------|--------------|-------------------------------|----------------------------|-------------------|---------------------------|-----------------|-------------------------------|---|
| 450              | 175       | 1/10                | 447                 | 19.7      | 85 ± 9        | 4 ± 3        | 12 ± 5                        | 2 ± 1                      | 2 ± 1             | 1 ± 0                     | 106 ± 9         | (1.6 ± 0.4) × 10 <sup>3</sup> | 6 |
| 480              | 35        |                     | 283                 | 10.8      | 7 ± 3         | 80 ± 10      | 6 ± 3                         | 6 ± 3                      | 4 ± 1             | 1 ± 0                     | 98 ± 3          | (3.9 ± 2.4) × 10 <sup>4</sup> | 3 |
| 480              | 45        |                     | 331                 | 13.2      | 17 ± 1        | 74 ± 4       | 8 ± 0                         | 8 ± 0                      | 7 ± 3             | 1 ± 0                     | 109 ± 6         | (5.9 ± 1.2) × 10 <sup>3</sup> | 4 |
| 480              | 55        |                     | 368                 | 14.9      | 25 ± 2        | 68 ± 3       | 6 ± 0                         | 6 ± 0                      | 5 ± 1             | 3 ± 1                     | 107 ± 5         | (3.7 ± 1.0) × 10 <sup>3</sup> | 4 |
| 480              | 65        |                     | 396                 | 16.1      | 47 ± 17       | 37 ± 12      | 3 ± 1                         | 3 ± 1                      | 3 ± 4             | 8 ± 3                     | 100 ± 14        | (2.1 ± 1.2) × 10 <sup>3</sup> | 6 |
| 480              | 75        |                     | 418                 | 17.1      | 78 ± 2        | 16 ± 7       | 11 ± 5                        | 0 ± 0                      | 2 ± 2             | 0 ± 0                     | 107 ± 6         | (5.4 ± 0.2) × 10 <sup>2</sup> | 3 |
| 480              | 95        |                     | 446                 | 18.4      | 88 ± 9        | 3 ± 3        | 9 ± 2                         | 4 ± 1                      | 1 ± 0             | 2 ± 1                     | 108 ± 9         | (7.1 ± 2.1) × 10 <sup>2</sup> | 6 |
| 480              | 115       |                     | 462                 | 19.2      | 80 ± 11       | 5 ± 4        | 14 ± 10                       | 2 ± 1                      | 2 ± 1             | 1 ± 1                     | 103 ± 13        | (1.1 ± 0.4) × 10 <sup>3</sup> | 8 |
| 480              | 175       |                     | 477                 | 20.5      | 58 ± 17       | 5 ± 3        | 11 ± 9                        | 11 ± 9                     | 8 ± 5             | 2 ± 2                     | *86 ± 11        | (4.6 ± 2.5) × 10 <sup>3</sup> | 9 |
| 500              | 30        |                     | 266                 | 9.8       | 1 ± 0         | 83 ± 10      | 0 ± 0                         | 0 ± 0                      | 0 ± 0             | 0 ± 0                     | *84 ± 10        | (1.1 ± 0.8) × 10 <sup>6</sup> | 3 |
| 500              | 45        |                     | 344                 | 13.7      | 33 ± 11       | 55 ± 12      | 8 ± 3                         | 0 ± 0                      | 1 ± 0             | 3 ± 4                     | 100 ± 3         | (1.8 ± 0.7) × 10 <sup>3</sup> | 3 |
| 500              | 60        |                     | 399                 | 16.1      | 74 ± 10       | 9 ± 5        | 20 ± 6                        | 0 ± 0                      | 2 ± 0             | 8 ± 6                     | *115 ± 14       | (5.5 ± 1.9) × 10 <sup>2</sup> | 9 |
| 500              | 75        |                     | 435                 | 17.6      | 79 ± 9        | 4 ± 1        | 10 ± 4                        | 0 ± 0                      | 3 ± 1             | 0 ± 0                     | 96 ± 6          | (6.7 ± 1.4) × 10 <sup>2</sup> | 3 |
| 500              | 100       |                     | 470                 | 19.1      | 56 ± 7        | 4 ± 2        | 12 ± 3                        | 0 ± 0                      | 2 ± 0             | 2 ± 2                     | *76 ± 11        | (2.0 ± 0.6) × 10 <sup>3</sup> | 3 |
| 500              | 175       |                     | 497                 | 21.0      | 57 ± 13       | 3 ± 3        | 15 ± 2                        | 0 ± 0                      | 8 ± 6             | 0 ± 0                     | *79 ± 3         | (4.2 ± 1.5) × 10 <sup>3</sup> | 3 |
| 510              | 35        |                     | 300                 | 11.6      | 10 ± 3        | 82 ± 11      | 7 ± 5                         | 0 ± 0                      | 4 ± 2             | 0 ± 0                     | 103 ± 6         | (1.7 ± 1.0) × 10 <sup>4</sup> | 3 |
| 510              | 45        |                     | 351                 | 14.0      | 35 ± 1        | 50 ± 11      | 17 ± 7                        | 0 ± 0                      | 4 ± 5             | 0 ± 0                     | 107 ± 4         | (1.4 ± 0.1) × 10 <sup>3</sup> | 3 |
| 510              | 55        |                     | 390                 | 15.7      | 36 ± 2        | 43 ± 5       | 21 ± 3                        | 1 ± 1                      | 0 ± 0             | 1 ± 1                     | 103 ± 1         | (1.9 ± 0.2) × 10 <sup>3</sup> | 3 |
| 510              | 75        |                     | 443                 | 17.8      | 94 ± 3        | 1 ± 1        | 11 ± 0                        | 0 ± 0                      | 2 ± 1             | 0 ± 0                     | 107 ± 4         | (4.6 ± 0.3) × 10 <sup>2</sup> | 3 |
| 510              | 95        |                     | 473                 | 19.1      | 80 ± 6        | 1 ± 1        | 11 ± 4                        | 1 ± 1                      | 5 ± 3             | 0 ± 0                     | 99 ± 3          | (9.0 ± 1.2) × 10 <sup>2</sup> | 3 |
| 510              | 115       |                     | 491                 | 19.9      | 76 ± 4        | 1 ± 0        | 11 ± 0                        | 0 ± 0                      | 3 ± 0             | 0 ± 0                     | *90 ± 4         | (1.3 ± 0.1) × 10 <sup>3</sup> | 3 |
| 510              | 175       |                     | 507                 | 21.2      | 30 ± 5        | 1 ± 1        | 12 ± 2                        | 0 ± 0                      | 0 ± 0             | 44 ± 6                    | *86 ± 2         | (1.6 ± 0.5) × 10 <sup>4</sup> | 3 |
| 540              | 35        |                     | 317                 | 12.3      | 25 ± 3        | 53 ± 2       | 13 ± 0                        | 1 ± 0                      | 1 ± 0             | 1 ± 0                     | 94 ± 6          | (1.9 ± 0.5) × 10 <sup>3</sup> | 4 |
| 540              | 45        |                     | 371                 | 14.7      | 30 ± 6        | 55 ± 5       | 12 ± 6                        | 0 ± 0                      | 2 ± 1             | 0 ± 0                     | 100 ± 9         | (2.1 ± 0.7) × 10 <sup>3</sup> | 3 |
| 540              | 55        |                     | 413                 | 16.4      | 68 ± 4        | 20 ± 8       | 18 ± 1                        | 1 ± 0                      | 1 ± 1             | 1 ± 1                     | 108 ± 4         | (5.4 ± 0.5) × 10 <sup>2</sup> | 3 |
| 540              | 65        |                     | 445                 | 17.6      | 81 ± 3        | 2 ± 1        | 27 ± 0                        | 4 ± 1                      | 3 ± 0             | 0 ± 0                     | *116 ± 4        | (5.1 ± 0.3) × 10 <sup>2</sup> | 4 |
| 540              | 75        |                     | 470                 | 18.5      | 93 ± 4        | 0 ± 0        | 10 ± 2                        | 3 ± 0                      | 2 ± 0             | 0 ± 0                     | 109 ± 7         | (4.8 ± 0.4) × 10 <sup>2</sup> | 4 |
| 540              | 85        |                     | 488                 | 19.2      | 88 ± 10       | 0 ± 0        | 10 ± 2                        | 0 ± 0                      | 1 ± 0             | 0 ± 0                     | 100 ± 8         | (6.9 ± 1.7) × 10 <sup>2</sup> | 4 |
| 540              | 105       |                     | 512                 | 20.2      | 62 ± 8        | 2 ± 1        | 18 ± 2                        | 1 ± 0                      | 2 ± 0             | 3 ± 0                     | 89 ± 10         | (1.8 ± 0.4) × 10 <sup>3</sup> | 3 |
| 540              | 135       |                     | 529                 | 21.2      | 42 ± 4        | 3 ± 2        | 10 ± 1                        | 1 ± 0                      | 6 ± 0             | 3 ± 0                     | *66 ± 6         | (5.2 ± 0.8) × 10 <sup>3</sup> | 3 |

Table S2. Continued.

| $T_{SP}$<br>(°C) | $t$<br>(sec) | $m_{PET}/$<br>$m_w$ | $T_{final}$<br>(°C) | $\log SI$ | $Y_{TPA}$ (%) | $Y_{US}$ (%) | $Y_{isophthalic}$<br>acid (%) | $Y_{phthalic}$<br>acid (%) | $Y_{BHET}$<br>(%) | $Y_{Benzoic}$<br>Acid (%) | Ring Bal<br>(%) | $\xi$ (°C·min)                | N |
|------------------|--------------|---------------------|---------------------|-----------|---------------|--------------|-------------------------------|----------------------------|-------------------|---------------------------|-----------------|-------------------------------|---|
| 540              | 175          | 1/10                | 537                 | 21.9      | 30 ± 1        | 1 ± 0        | 15 ± 0                        | 1 ± 0                      | 8 ± 1             | 11 ± 2                    | *65 ± 2         | (1.5 ± 0.1) × 10 <sup>4</sup> | 2 |
| 550              | 15           |                     | 178                 | 4.1       | 0 ± 0         | 81 ± 1       | 1 ± 0                         | 0 ± 0                      | 1 ± 0             | 0 ± 0                     | *83 ± 1         | (2.3 ± 0.5) × 10 <sup>5</sup> | 3 |
| 550              | 30           |                     | 291                 | 11.0      | 9 ± 2         | 81 ± 9       | 5 ± 5                         | 0 ± 0                      | 4 ± 3             | 2 ± 1                     | 102 ± 2         | (1.9 ± 1.8) × 10 <sup>4</sup> | 3 |
| 550              | 35           |                     | 323                 | 12.5      | 13 ± 9        | 66 ± 3       | 11 ± 5                        | 0 ± 0                      | 2 ± 1             | 3 ± 1                     | 96 ± 6          | (2.7 ± 2.9) × 10 <sup>4</sup> | 4 |
| 550              | 45           |                     | 378                 | 14.9      | 17 ± 10       | 50 ± 12      | 15 ± 6                        | 0 ± 0                      | 1 ± 0             | 2 ± 1                     | 85 ± 14         | (1.5 ± 1.5) × 10 <sup>4</sup> | 4 |
| 550              | 55           |                     | 421                 | 16.6      | 41 ± 8        | 25 ± 1       | 26 ± 9                        | 0 ± 0                      | 3 ± 1             | 25 ± 6                    | *121 ± 8        | (1.8 ± 0.8) × 10 <sup>3</sup> | 4 |
| 550              | 60           |                     | 438                 | 17.3      | 41 ± 15       | 1 ± 0        | 36 ± 2                        | 0 ± 0                      | 0 ± 3             | 0 ± 0                     | *77 ± 5         | (2.2 ± 0.6) × 10 <sup>3</sup> | 3 |
| 550              | 65           |                     | 453                 | 17.8      | 23 ± 3        | 1 ± 1        | 33 ± 3                        | 0 ± 0                      | 5 ± 0             | 0 ± 1                     | *62 ± 13        | (2.4 ± 2.2) × 10 <sup>4</sup> | 2 |
| 570              | 15           |                     | 184                 | 4.5       | 11 ± 0        | 100 ± 1      | 1 ± 0                         | 0 ± 0                      | 2 ± 0             | 0 ± 0                     | 114 ± 15        | (1.0 ± 0.7) × 10 <sup>6</sup> | 3 |
| 570              | 30           |                     | 301                 | 11.4      | 2 ± 1         | 86 ± 12      | 2 ± 1                         | 0 ± 0                      | 3 ± 0             | 1 ± 0                     | 94 ± 12         | (2.3 ± 0.9) × 10 <sup>5</sup> | 3 |
| 570              | 35           |                     | 334                 | 13.0      | 15 ± 13       | 19 ± 14      | 13 ± 11                       | 0 ± 0                      | 1 ± 1             | 23 ± 15                   | *71 ± 26        | (4.9 ± 9.5) × 10 <sup>6</sup> | 5 |
| 570              | 45           |                     | 391                 | 15.4      | 48 ± 7        | 31 ± 11      | 13 ± 11                       | 0 ± 0                      | 6 ± 3             | 1 ± 1                     | 98 ± 16         | (9.5 ± 3.5) × 10 <sup>2</sup> | 5 |
| 570              | 55           |                     | 436                 | 17.0      | 47 ± 16       | 1 ± 2        | 23 ± 17                       | 0 ± 0                      | 5 ± 2             | 4 ± 2                     | *79 ± 10        | (1.9 ± 1.4) × 10 <sup>3</sup> | 6 |
| 570              | 60           |                     | 454                 | 17.7      | 24 ± 0        | 7 ± 2        | 23 ± 2                        | 0 ± 0                      | 0 ± 0             | 6 ± 0                     | *60 ± 5         | (5.4 ± 0.1) × 10 <sup>3</sup> | 3 |
| 570              | 65           |                     | 470                 | 18.3      | 20 ± 1        | 3 ± 2        | 1 ± 2                         | 0 ± 0                      | 0 ± 0             | 47 ± 17                   | *72 ± 19        | (8.6 ± 0.7) × 10 <sup>3</sup> | 3 |
| 570              | 175          |                     | 567                 | 22.5      | 13 ± 1        | 0 ± 0        | 16 ± 1                        | 6 ± 0                      | 4 ± 0             | 32 ± 1                    | 87 ± 13         | (6.9 ± 1.4) × 10 <sup>4</sup> | 3 |
| 510              | 45           | 1/8                 | 351                 | 14.0      | 48 ± 7        | 37 ± 0       | 15 ± 2                        | 0 ± 0                      | 12 ± 1            | 1 ± 0                     | 113 ± 10        | (6.5 ± 0.2) × 10 <sup>2</sup> | 3 |
| 510              | 55           |                     | 390                 | 15.7      | 35 ± 5        | 25 ± 11      | 40 ± 3                        | 0 ± 0                      | 10 ± 2            | 0 ± 0                     | 109 ± 11        | (1.7 ± 0.5) × 10 <sup>3</sup> | 3 |
| 510              | 65           |                     | 421                 | 16.9      | 69 ± 13       | 1 ± 0        | 32 ± 13                       | 0 ± 0                      | 4 ± 2             | 0 ± 0                     | 106 ± 4         | (5.9 ± 1.9) × 10 <sup>2</sup> | 3 |
| 510              | 75           |                     | 443                 | 17.8      | 86 ± 7        | 1 ± 0        | 3 ± 1                         | 0 ± 0                      | 5 ± 0             | 3 ± 0                     | 99 ± 8          | (4.4 ± 0.7) × 10 <sup>2</sup> | 4 |
| 510              | 85           |                     | 461                 | 18.5      | 75 ± 9        | 1 ± 0        | 18 ± 2                        | 0 ± 0                      | 5 ± 2             | 0 ± 0                     | 99 ± 8          | (7.2 ± 1.6) × 10 <sup>2</sup> | 3 |
| 510              | 45           | 1/6                 | 351                 | 14.0      | 38 ± 6        | 37 ± 6       | 7 ± 2                         | 0 ± 0                      | 9 ± 2             | 1 ± 0                     | 93 ± 4          | (7.9 ± 2.3) × 10 <sup>2</sup> | 3 |
| 510              | 55           |                     | 390                 | 15.7      | 36 ± 13       | 28 ± 0       | 42 ± 13                       | 0 ± 0                      | 14 ± 4            | 0 ± 0                     | *120 ± 5        | (1.7 ± 1.1) × 10 <sup>3</sup> | 2 |
| 510              | 65           |                     | 421                 | 16.9      | 55 ± 2        | 4 ± 4        | 43 ± 4                        | 0 ± 0                      | 6 ± 4             | 0 ± 0                     | 108 ± 5         | (6.4 ± 0.5) × 10 <sup>2</sup> | 3 |
| 510              | 75           |                     | 443                 | 17.8      | 71 ± 6        | 4 ± 3        | 14 ± 14                       | 0 ± 0                      | 6 ± 2             | 5 ± 2                     | 99 ± 8          | (4.9 ± 0.8) × 10 <sup>2</sup> | 4 |
| 510              | 85           |                     | 461                 | 18.5      | 59 ± 7        | 1 ± 0        | 32 ± 8                        | 0 ± 0                      | 7 ± 3             | 0 ± 0                     | 98 ± 4          | (8.7 ± 2.1) × 10 <sup>2</sup> | 3 |
| 510              | 45           | 1/4                 | 351                 | 14.0      | 33 ± 8        | 24 ± 24      | 12 ± 4                        | 0 ± 0                      | 10 ± 11           | 4 ± 3                     | *82 ± 19        | (7.4 ± 2.8) × 10 <sup>2</sup> | 3 |
| 510              | 55           |                     | 390                 | 15.7      | 24 ± 27       | 9 ± 0        | 33 ± 2                        | 0 ± 0                      | 9 ± 2             | 0 ± 0                     | *76 ± 30        | (2.5 ± 1.9) × 10 <sup>4</sup> | 3 |
| 510              | 65           |                     | 421                 | 16.9      | 45 ± 6        | 0 ± 0        | 39 ± 7                        | 0 ± 0                      | 10 ± 5            | 0 ± 0                     | 94 ± 14         | (6.7 ± 1.7) × 10 <sup>2</sup> | 3 |
| 510              | 75           |                     | 443                 | 17.8      | 44 ± 5        | 1 ± 0        | 37 ± 6                        | 0 ± 0                      | 6 ± 1             | 0 ± 0                     | 89 ± 2          | (8.5 ± 2.0) × 10 <sup>2</sup> | 3 |

Table S2. Continued.

| $T_{SP}$<br>(°C) | $t$<br>(sec) | $m_{PET}/$<br>$m_w$ | $T_{final}$<br>(°C) | $\log SI$ | $Y_{TPA}$ (%) | $Y_{US}$ (%) | $Y_{isophthalic}$<br>acid (%) | $Y_{phthalic}$<br>acid (%) | $Y_{BHET}$<br>(%) | $Y_{Benzoic}$<br>Acid (%) | Ring Bal<br>(%) | $\xi$ (°C·min)                | N |
|------------------|--------------|---------------------|---------------------|-----------|---------------|--------------|-------------------------------|----------------------------|-------------------|---------------------------|-----------------|-------------------------------|---|
| 510              | 85           | 1/4                 | 461                 | 18.5      | 33 ± 3        | 0 ± 0        | 36 ± 16                       | 0 ± 0                      | 5 ± 1             | 0 ± 0                     | *74 ± 15        | (1.8 ± 0.3) × 10 <sup>3</sup> | 3 |
| 500              | 60           | 1/3                 | 399                 | 16.1      | 51 ± 17       | 18 ± 19      | 30 ± 28                       | 0 ± 0                      | 4 ± 4             | 0 ± 0                     | 103 ± 28        | (6.3 ± 4.2) × 10 <sup>2</sup> | 9 |
| 510              | 45           | 1/2                 | 351                 | 14.0      | 20 ± 5        | 20 ± 15      | 27 ± 9                        | 0 ± 0                      | 24 ± 13           | 0 ± 0                     | 91 ± 4          | (1.1 ± 0.6) × 10 <sup>2</sup> | 3 |
| 510              | 55           |                     | 390                 | 15.7      | 1 ± 1         | 1 ± 1        | 33 ± 11                       | 0 ± 0                      | 9 ± 4             | 0 ± 0                     | *43 ± 14        | (3.0 ± 3.4) × 10 <sup>6</sup> | 3 |
| 510              | 65           |                     | 421                 | 16.9      | 17 ± 6        | 5 ± 5        | 20 ± 15                       | 0 ± 0                      | 3 ± 3             | 0 ± 0                     | *45 ± 19        | (3.2 ± 2.0) × 10 <sup>3</sup> | 2 |
| 510              | 75           |                     | 443                 | 17.8      | 4 ± 0         | 0 ± 0        | 2 ± 0                         | 0 ± 0                      | 3 ± 0             | 1 ± 0                     | *14 ± 1         | (4.0 ± 0.3) × 10 <sup>4</sup> | 2 |
| 510              | 85           |                     | 461                 | 18.5      | 14 ± 8        | 0 ± 0        | 49 ± 5                        | 0 ± 0                      | 6 ± 1             | 0 ± 0                     | *69 ± 13        | (4.2 ± 0.6) × 10 <sup>4</sup> | 3 |
| 480              | 75           | 1/8                 | 418                 | 17.1      | 69 ± 6        | 0 ± 0        | 18 ± 2                        | 0 ± 0                      | 6 ± 2             | 0 ± 0                     | 94 ± 4          | (6.2 ± 1.2) × 10 <sup>2</sup> | 3 |
| 500              | 60           |                     | 399                 | 16.1      | 66 ± 13       | 1 ± 0        | 27 ± 8                        | 0 ± 0                      | 0 ± 0             | 10 ± 1                    | 104 ± 20        | (5.7 ± 2.7) × 10 <sup>2</sup> | 3 |
| 540              | 55           |                     | 413                 | 16.4      | 68 ± 6        | 8 ± 10       | 8 ± 6                         | 0 ± 0                      | 0 ± 0             | 13 ± 6                    | 97 ± 20         | (4.5 ± 0.1) × 10 <sup>2</sup> | 3 |
| 550              | 35           |                     | 323                 | 12.5      | 27 ± 10       | 55 ± 9       | 16 ± 7                        | 0 ± 0                      | 1 ± 1             | 14 ± 6                    | 112 ± 15        | (1.9 ± 0.9) × 10 <sup>3</sup> | 3 |

\* ring balance differs by more than ± 15% from 100% or ring balance had a mean value that differed from 100% with statistical significance ( $p < 0.05$ ).

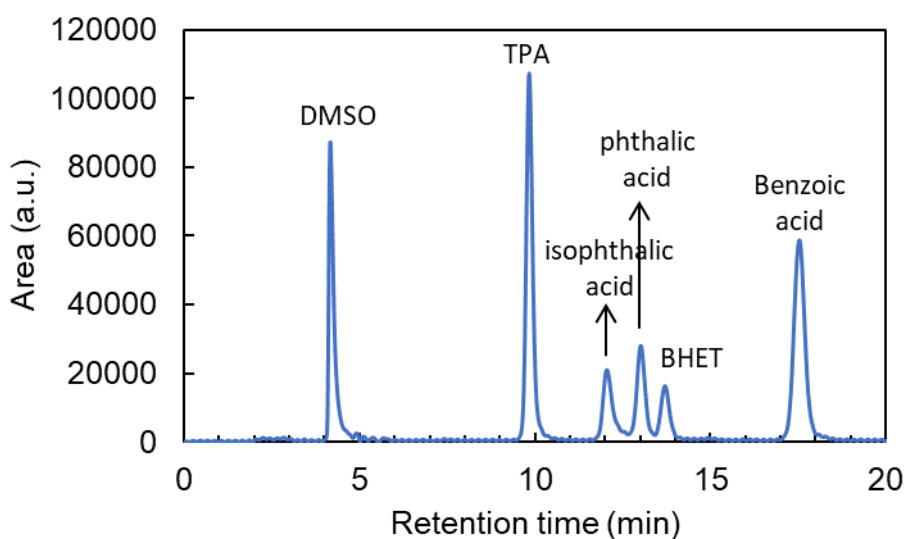

Figure S3. HPLC chromatogram of dissolved solids in aqueous filtrate from a representative PET hydrolysis experiment at set point temperature of 450 °C for 135 seconds, with 1/10 PET/water mass ratio.

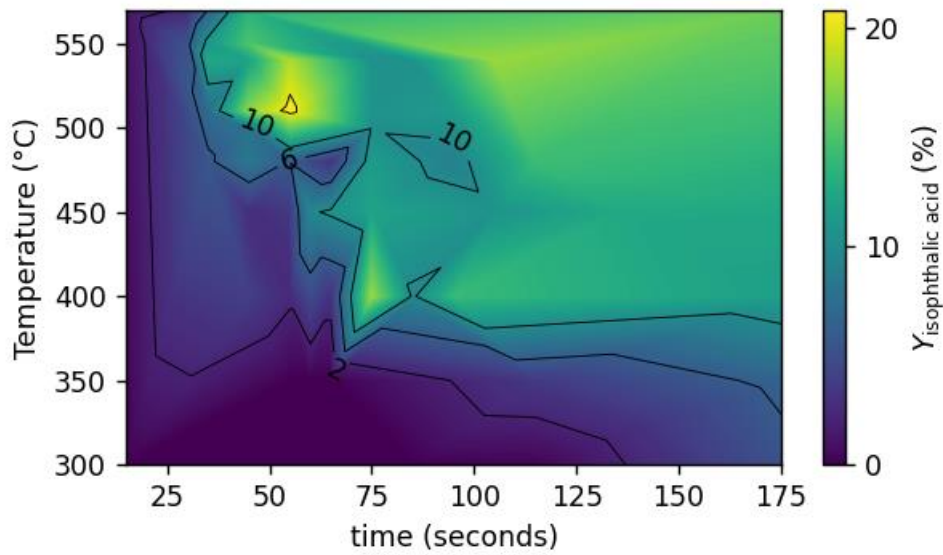

Figure S4. Contour plot illustrating effects of set point temperature and batch holding time on isophthalic acid yield from fast hydrolysis of PET ( $m_{\text{PET}}/m_{\text{W}} = 1/10$ ).

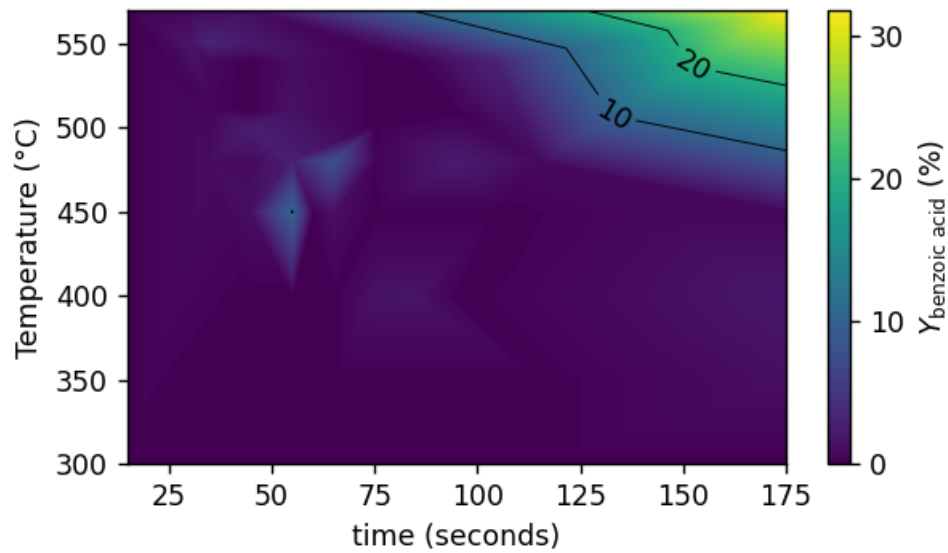

Figure S5. Contour plot illustrating effects of set point temperature and batch holding time on benzoic acid yield from fast hydrolysis of PET ( $m_{\text{PET}}/m_{\text{W}} = 1/10$ ).

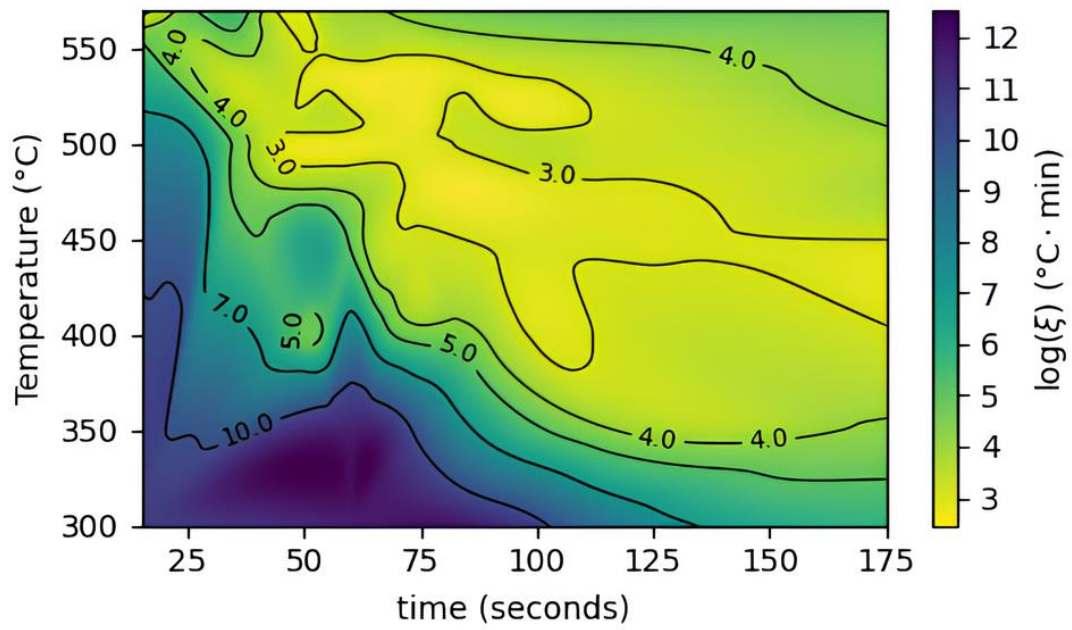

Figure S6. Contour plot illustrating effects of set point temperature and batch holding time on the logarithm of the environmental energy impact from fast hydrolysis of PET ( $m_{\text{PET}}/m_{\text{W}} = 1/10$ ).
